# Supplementary material
Source: PubMed Central journal article supplement (PMC3314336)
Supplement: NIHMS169920-supplement-01.pdf [file NIHMS169920-supplement-01.pdf]

## Supplemental Information

### Irs1 Serine 307 Promotes

### Insulin Sensitivity in Mice

Kyle D. Copps, Nancy J. Hancer, Lynn Opare-Ado, Wei Qiu, Cari Walsh, and Morris F. White

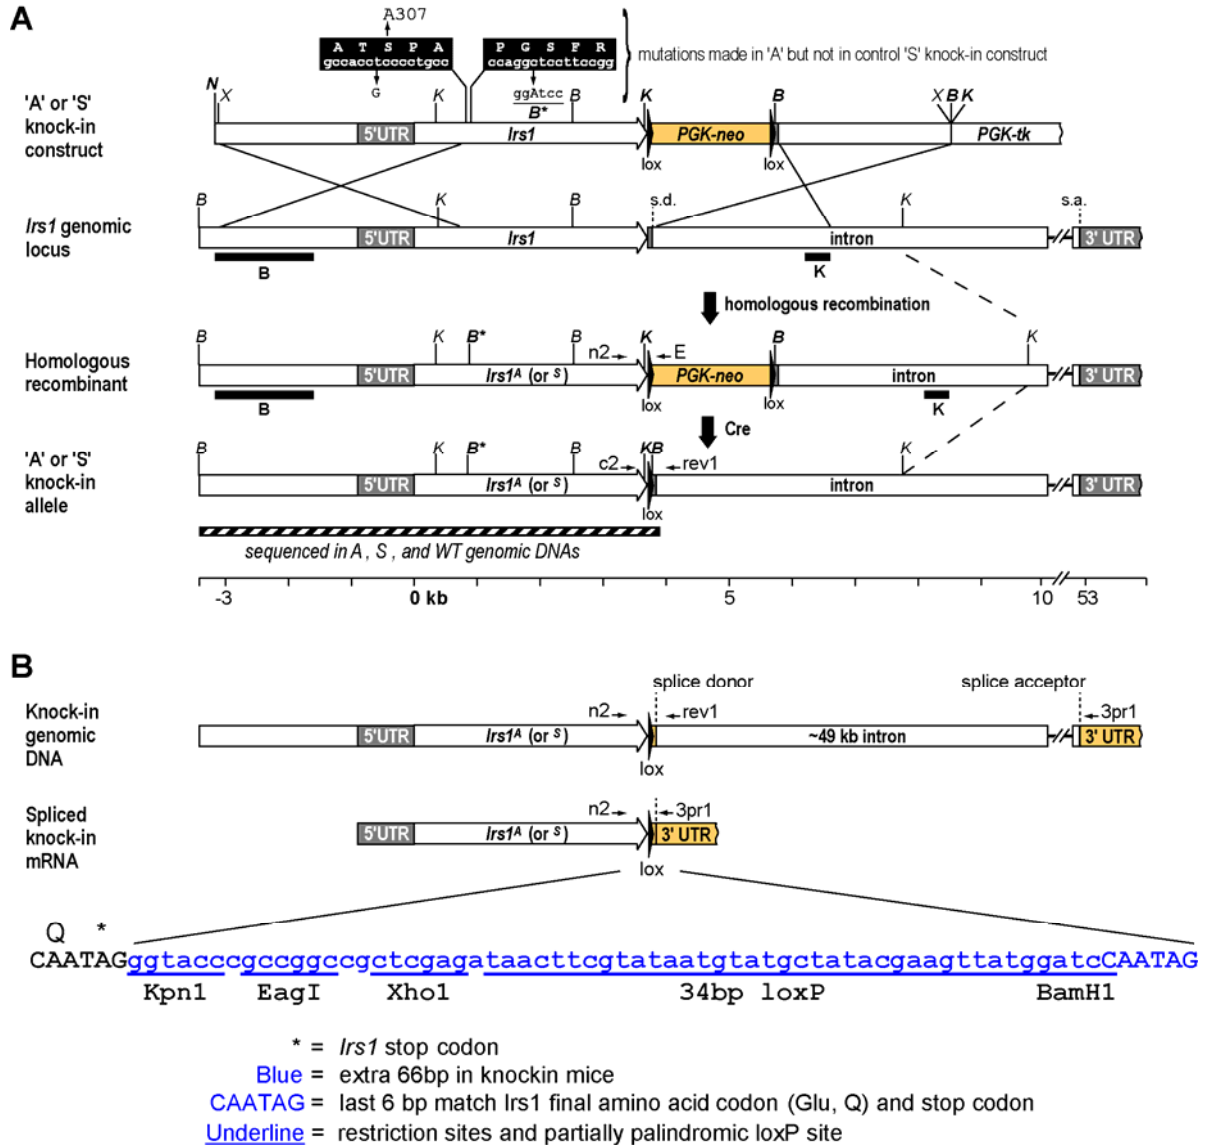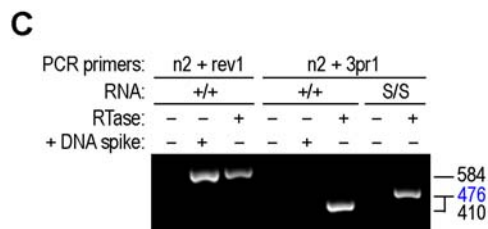

**Figure S1. Construction of *Irs1*<sup>A</sup> (Ser307Ala) and *Irs1*<sup>S</sup> (non-mutant control) knock-in alleles**

(A) Homologous recombination of mutant ('A') and control ('S') plasmid constructs with the single-exon *Irs1* gene; restriction sites *N*: *NotI*; *X*: *XhoI*; *K*: *KpnI*; *B*: *BamHI* (**bold** sites introduced via plasmid construct); black bars: probes 'B' and 'K' for identification of homologous recombinants in *BamHI*- or *KpnI*-digested DNA; *Cre*: *Cre* recombinase, provided by mating to female EIIa-Cre mice; lox: loxP substrate of Cre recombinase; s.d.: splice donor; s.a.: splice acceptor; UTR: untranslated region; striped bar: sequenced portion of knock-in genomic DNAs; PCR primers: n2, c2, E, rev1.

(B) Detail of extra 66 bp in knock-in mice immediately following the *Irs1* stop codon. Length of the 5' UTR in the *Irs1* transcript is imputed from the literature. PCR primers: n2 + rev1 (amplify unspliced mRNA and genomic DNA); n2 + 3pr1 (amplify spliced mRNA).

(C) Normal splicing of *Irs1* across the extra 66 DNA bp in knock-in mice. Indicated total mRNAs (RNA) were subjected to oligo-dT/random-primed reverse transcription with (+) or without (-) reverse transcriptase (RTase), then spiked (+) or not spiked (-) with wild-type genomic DNA (+ DNA spike) and subjected to PCR with the indicated primers (locations in B).

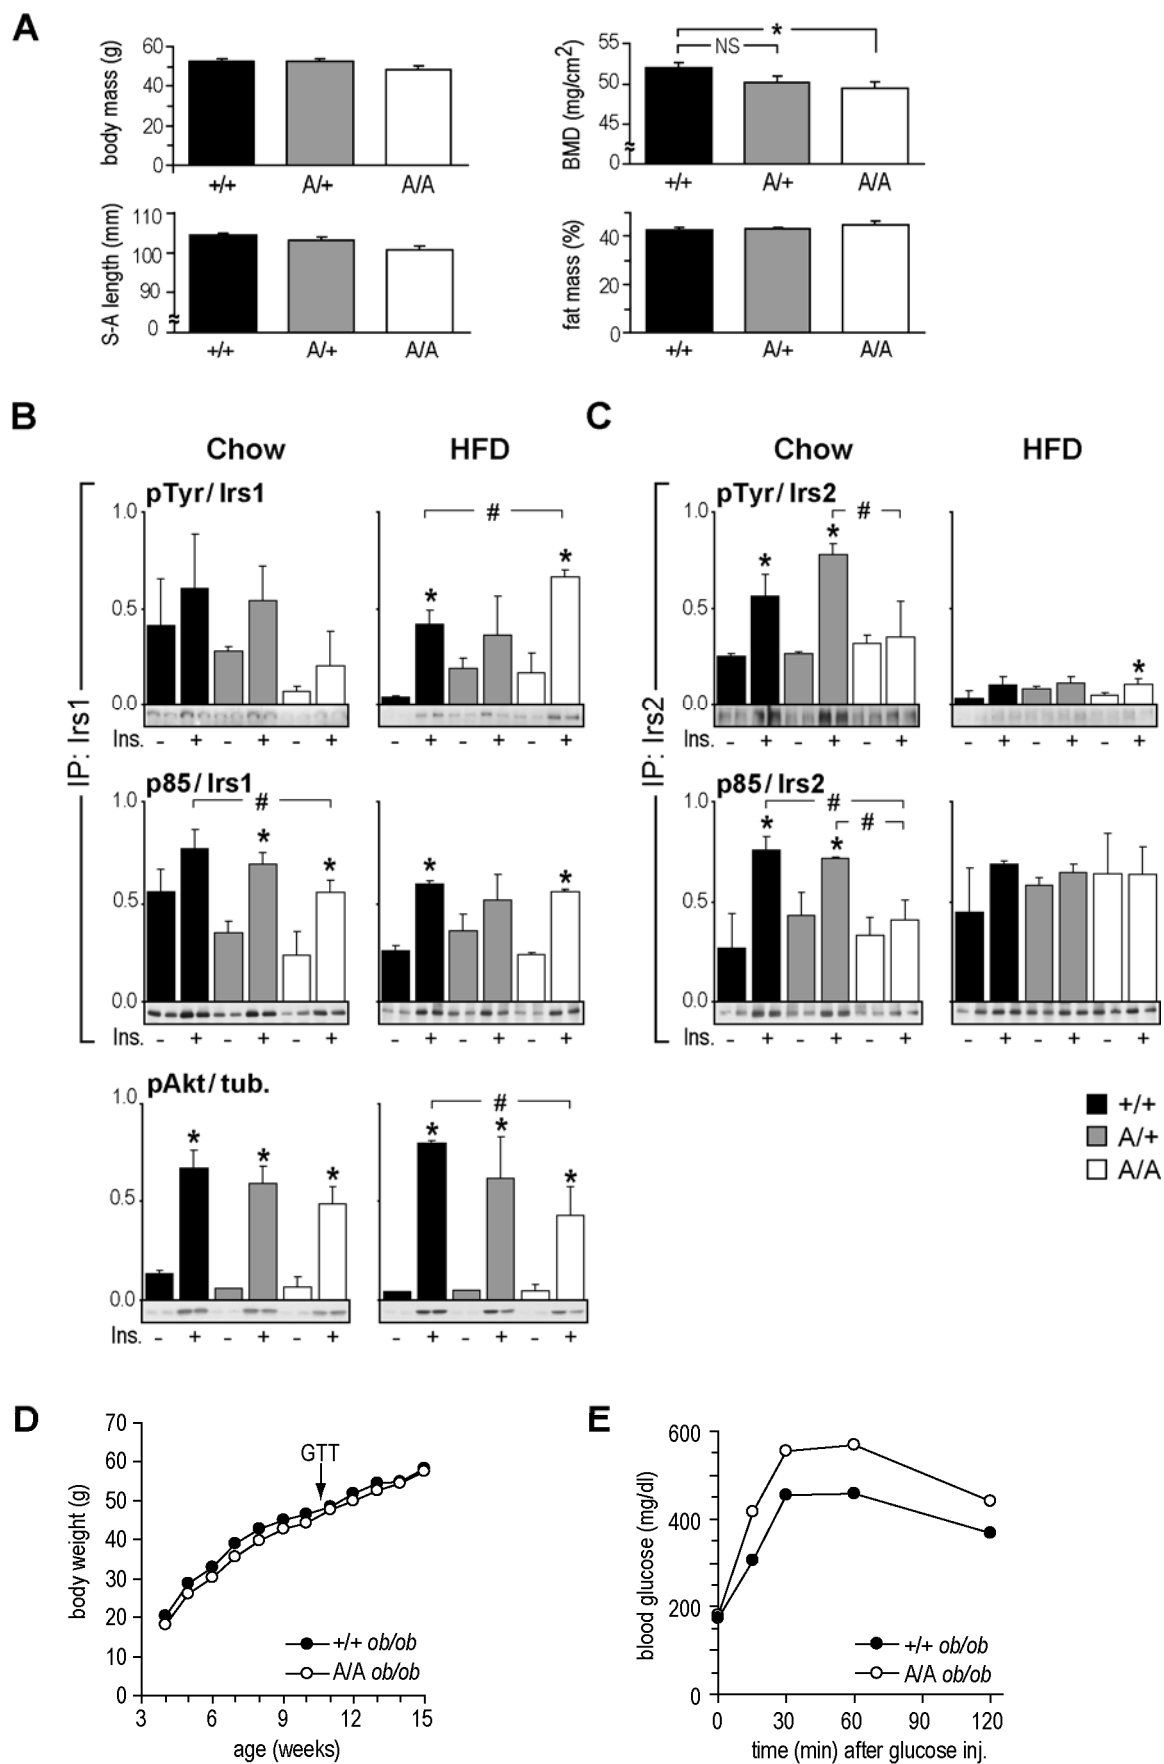

## Figure S2. Additional data from HFD-fed and *ob/ob* mice

(A) Body composition of HFD-fed wild-type (+/+), heterozygous (A/+), and homozygous (A/A) mice, assayed by dual X-ray absorptiometry.

(B-C) Immunoprecipitation (IP:) and immunoblot analysis of insulin signaling by Irs1 and Akt or (C) Irs2 in liver of chow- and HFD-fed mice; pTyr: phosphotyrosine; pAkt: phospho-Thr308<sup>Akt</sup>. In panels B and C, the estimated means of phosphotyrosine, p85, or phospho-Thr308<sup>Akt</sup> signals (see methods) were normalized to the average total Irs1, Irs2, or tubulin concentrations; \* = significant difference (Bonferroni  $p < 0.05$ ) vs. unstimulated; # = significant difference (Bonferroni  $p < 0.05$ ) between indicated insulin-stimulated samples.

(D-E) Body weight gain and (E) glucose tolerance test for a pair of littermate +/+ and A/A male mice on the (C57BL6) *ob/ob* background.

## SUPPLEMENTAL EXPERIMENTAL PROCEDURES

### Generation of Knock-in Mice

The mutant Ser307Ala knock-in allele (*Irs1<sup>A</sup>*, A) was generated using a targeting construct based on the pPNT vector (Figure S1A) modified to contain two loxP sites flanking the *PGK-neo* selectable marker (pPNT2loxP). The floxed *PGK-neo* gene was immediately preceded by unique *NotI* and *XhoI* sites and immediately followed by a unique *BamHI* site. The right arm of the construct was inserted at the *BamHI* site and consisted of the first 3 kb of (129Sv) mouse genomic DNA immediately following the *Irs1* stop codon (extending 3' to an *XbaI* site) and engineered to have *BamHI* ends. The left arm of the construct was generated in a separate plasmid (pBS8) and consisted of ~6.8 kb of contiguous (129Sv) mouse *Irs* genomic DNA, stretching from an upstream *XbaI* site to the stop codon of the single-exon *Irs1* gene.

Mutagenic primers (mutant nucleotides capitalized) were used to introduce the Ser307Ala mutation in pBS8,

sense: 5'- gcatcactgccaccGccctgccagta,

anti-sense: 5'- tactggcaggggCggtggcagtgatgc,

followed by a novel *BamHI* site,

sense: 5'- cctgccagtatggtgggtgggaaccaggAtccttccgg,

anti-sense: 5'- ccggaaggaTcctggttcccaccaccatactggcagg.

The novel *BamHI* marked, but did not alter the *Irs1* coding sequence, and was used for genotyping (below). A portion of the doubly-mutated pBS8 was subcloned into fresh pBS8 backbone and then sequenced to verify the absence of any undesired mutations. The completed left arm was ligated into the unique *NotI* of pPNT2loxP as an *EagI* fragment, regenerating the *NotI* site on the 5' side in the sense of the *Irs1* gene; this site was used to linearize the mature construct for transfection into R1 ES cells. Potential homologous recombinant ES cells emerging from double-selection in G418 and gancyclovir were screened by sequential Southern blotting of *KpnI*- and *BamHI*-digested genomic DNA with probes K and B (Figure S1A). Correctly targeted (*Irs1<sup>A/+</sup>*) clones gave 6009 bp recombinant and 7478 bp wild-type bands with probe K, and 4327 bp recombinant and 5854 bp wild-type bands with probe B.

The control Ser307Ser knock-in allele (*Irs1<sup>S</sup>*, S) was generated by essentially identical means as a byproduct of targeting of the wild-type *Irs1<sup>lox</sup>* conditional allele (Dong et al., 2008). In this case, 3' homologous recombinants were identified (as above, probe K) that failed to incorporate a loxP site ~1.6 kb upstream of the *Irs1* start codon within the *Irs1<sup>lox</sup>* targeting construct. These were then verified to have undergone 5' homologous recombination between the lost loxP marker and downstream *PGK-neo* marker using Southern blotting of *BamHI*-digested ES cell DNA with a ~1 kb *BstBI-BamHI* probe from near the beginning of the *Irs1* coding sequence. In this assay, positive clones gave only the above 5854 bp *BamHI* fragment.

Several correctly targeted *Irs1<sup>A/+</sup>* and *Irs1<sup>S/+</sup>* ES cell clones were injected separately into C57BL/6 blastocysts to generate highly chimaeric males potentially bearing *Irs1<sup>A</sup>* or *Irs1<sup>S</sup>* germ cells. Sperm of these mice were sampled by repeated mating to C57BL/6J females to generate (agouti) *Irs1<sup>A/+</sup>* and *Irs1<sup>S/+</sup>* founder mice, which were used to establish a single *Irs1<sup>A</sup>* line and two *Irs1<sup>S</sup>* lines. Male *Irs1<sup>A/+</sup>* and *Irs1<sup>S/+</sup>* mice were mated to a “deleter” Cre strain (129Sv; EIIa-Cre, Jackson Laboratories) to remove the floxed *PGK-neo* gene. Progeny of this cross were screened using the primers c2 and rev1 (described below, locations in Figure S1A) to identify instances of *PGK-neo* deletion and the EIIa-Cre transgene was bred away during nine subsequent backcrosses to inbred C57BL/6 mice. Deletion of *PGK-neo* yielded 424 bp recombinant and 358 bp wild-type bands, owing to the insertion of 66 bp between the *Irs1* stop codon and the first nucleotide of the *Irs1* 3' UTR in the knock-in alleles. The exact sequence of the 66 bp insertion is shown in

Figure S1B. In the 21 bp following the insertion and preceding the splice site of *Irs1* mRNA, two base pairs not conserved in mice, rats, and humans were also changed to match the rat *Irs1* sequence: caatagcTtaactggacGtcacagcag (changes capitalized). Eventual sequencing of the entire 6.8 kb left arm region of the *Irs1<sup>A</sup>* and *Irs1<sup>S</sup>* alleles from mouse tail DNA showed no differences in *Irs1* 5' control regions or *Irs1* protein coding potential other than those described here.

### Mouse genotyping

Mice and embryos were genotyped using PCR with primers shown in Figure S1A. The presence of knock-in alleles still containing the *PGK-neo* gene was observed using the three primers:

n2 (5' - gcagtgaggatgtaaaacgccacagctctgcatc),  
E (5' - ggggccctcgacataacttcgtatagcatacat), and  
rev1 (5' - agagagaagcccttctgtggctgctccaaacaca),

in the ratio 2:1:2, yielding 386 bp knock-in and 584 bp wild-type products.

Following *Cre*-mediated removal of *PGK-neo*, the progeny of *Irs1<sup>A/+</sup>* or *Irs1<sup>S/+</sup>* pairs were genotyped using primers:

c2 (5' - cagcaatgagggcaactccccaagacgctcca) and  
rev1 (above),

yielding 424 bp knock-in and 358 bp wild-type products.

The progeny of *Irs1<sup>A/S</sup>* compound heterozygote matings were distinguished using a four-primer allele-specific PCR with nested primers surrounding the Ser307Ala mutation:

S7AF3 (5' - gcagcaaaagccagctctcatcc),  
NotBamR (5' - aggcacgcacccggaaggag),  
BamF (5' - agtatgggtgggaaaccagga), and  
S7AR (5' - ctggggtgacactcgcgaagg).

In this assay, PCR of the *BamHI*-marked *Irs1<sup>A</sup>* allele (primers BamF + S7AR) gives a 399 bp product, while PCR of the *Irs1<sup>S</sup>* allele (primers S7AF3 + NotBamR) gives a 185 bp product. PCR of either allele (outer primers S7AF3 + S7AR) gives a 542 bp product.

### RT-PCR of the *Irs1* transcript

Proper splicing of knock-in transcripts (Figure S1C) was verified by reverse-transcriptase PCR (RT-PCR) with the primers:

n2 (above) and  
3prev1 (5' - tgaaatagttcgagtctgggtacccatgag),

giving 476 bp knock-in and 410 bp wild-type products.

### Generation of LKO2-background mice

To produce mice lacking hepatic *Irs2*, mixed background (129Sv × C57BL/6) *Alb-Cre<sup>+</sup>* *Irs1<sup>lox/lox</sup>* *Irs2<sup>lox/lox</sup>* (LDKO) males {Dong, 2008 23028 /id} were bred with (C57BL/6) *Irs1<sup>A/+</sup>* females. The progeny were intercrossed to make the *Irs2<sup>lox</sup>* allele homozygous, after which *Alb-Cre<sup>+</sup>* *Irs1<sup>A/lox</sup>* *Irs2<sup>lox/lox</sup>* (A/lox::LKO2) and *Alb-Cre<sup>+</sup>* *Irs1<sup>+/lox</sup>* *Irs2<sup>lox/lox</sup>* males (+/lox::LKO2) were crossed with *Cre*-negative females to produce the mice in Figure 4.

### Isolation of primary hepatocytes

For isolation of primary hepatocytes, livers of 6-month-old male mice were perfused via the vena cava using a syringe pump for 2 min. at ~3 mL/min. and then for 6 min. at ~7 mL/min., first with PS1 (1X HBSS, 1mM EGTA, 5.5 mM glucose) containing 100 U/mL penicillin/100 µg/mL streptomycin (P/S) to clear, then with PS2 (1X HBSS, 1.5 mM CaCl<sub>2</sub>, 5.5 mM glucose, plus P/S) containing 0.375 mg/mL (~88 U/mL) of collagenase (Type 1, Worthington). Liver cells were dissociated by agitation with forceps in 5 mL of PS2 in a petri dish, then filtered through a 70

$\mu\text{m}$  nylon filter and placed on ice. Non-parenchymal and dead cells were removed as follows. The filtered cells were spun once at  $240 \times g$ , resuspended in 8 mL of cold Williams E medium (Gibco) plus P/S, then mixed with 10 mL of a 1:9 (v/v) mix of 10X HBSS:Percoll (Amersham), and spun at  $240 \times g$  for 8 min. The pelleted cells (mostly live hepatocytes) were then washed twice with 10 mL of Williams E medium plus P/S, resuspended in 10 mL of growth medium (Williams E, P/S, L-glutamine, and 10% FBS), and counted. Cells were plated at a density of  $4 \times 10^4/\text{cm}^2$  on plates coated with rat tail collagen (Collaborate Biochemical) and incubated for for  $\sim 3$  h to allow attachment of hepatocytes. The attached hepatocytes were washed twice with warmed Williams E plus P/S and L-glutamine and incubated for 12 h in this medium before treatment with insulin.

## **Antibodies**

Antibodies to actin, tubulin, and p110 $\alpha$ , and phospho-specific antibodies to Akt (T308), Tsc2 (T1462), S6k (T389), Foxo1 (S256), and Irs1 (S302) and were from Cell Signaling Technology. Polyclonal antibodies to Irs1, Irs2, p85 and phospho-S307 of Irs1 were from UBI/Millipore, and anti-phosphotyrosine (4G10) and actinin antibodies were from Sigma. Irs2 was precipitated using protein A-purified polyclonal rabbit serum raised against the full length protein. In primary hepatocyte experiments, Irs1 was precipitated using a phosphorylation-insensitive mouse monoclonal antibody raised against an Irs1 peptide. In Fig 3F, Irs1 Ser/Thr phosphorylation was quantitated using a partial panel of mouse monoclonal antibodies previously determined to be highly site- and phospho- specific by peptide ELISA and/or peptide competition of Western blot immunoreactivity toward phosphorylated Irs1 (lysate of CHO-IR/Irs1 cells stimulated with okadaic acid).
